# Supplementary material for: NAT1/DAP5/p97 and Atypical Translational Control in the Drosophila Circadian Oscillator
Source: Oxford University Press journal article supplement (doi:10.1534/genetics.112.143248), 2012-08-19
Supplement: genetics.112.143248-2.pdf [file genetics.112.143248-2.pdf]

| Genotype                                                         | n  | mean | sd  | se  | off | off sd | ri  | ri sd | rs   | rs sd | %Rh  |
|------------------------------------------------------------------|----|------|-----|-----|-----|--------|-----|-------|------|-------|------|
| dNAT1 P2: w[1118]; P[w[+mGT]=GT1]NAT1[BG02338]                   | 24 | 23.3 | 0.2 | 0.1 | 2.4 | 1.1    | 0.4 | 0.1   | 8.5  | 2.0   | 75%  |
| P2/P1                                                            | 24 | 23.4 | 0.3 | 0.1 | 3.5 | 1.9    | 0.5 | 0.1   | 13.1 | 3.6   | 100% |
| P2/P1cyo                                                         | 22 | 24.2 | 0.3 | 0.1 | 2.1 | 0.7    | 0.5 | 0.1   | 12.3 | 3.4   | 91%  |
| P2/P3                                                            | 16 | 24.2 | 1.4 | 0.6 | 3.8 | 3.0    | 0.5 | 0.1   | 12.6 | 3.3   | 75%  |
| dNAT P1: cn[1] P[ry[+7.2]=PZ]NAT1[O1424]/CyO; ry[506]            | 12 | 23.7 | 0.5 | 0.2 | 2.2 | 1.1    | 0.5 | 0.1   | 11.6 | 2.6   | 100% |
| P1/P3                                                            | 15 | 24.0 | 0.3 | 0.1 | 1.7 | 0.9    | 0.5 | 0.1   | 11.3 | 2.9   | 80%  |
| P1cyo/P3                                                         | 20 | 24.2 | 0.3 | 0.1 | 2.9 | 1.7    | 0.5 | 0.1   | 10.1 | 1.6   | 70%  |
| dNAT1 P3: y[1] w[67c23]; P[w[+mC] y[+mDint2]=EPgy2]NAT1[EY08892] | 13 | 24.0 | 0.2 | 0.1 | 3.0 | 0.8    | 0.5 | 0.1   | 11.4 | 1.6   | 77%  |
| +;pdfGAL4/cyo;UAS-NAT1R/UAS-NAT1R                                | 22 | 25.7 | 0.3 | 0.1 | 3.4 | 1.3    | 0.4 | 0.1   | 8.5  | 2.5   | 91%  |
| +;pdfGAL4/P[w[+mC] y[+mDint2]=EPgy2]NAT1[EY08892];UAS-NAT1R/+    | 15 | 25.6 | 0.3 | 0.1 | 3.7 | 1.3    | 0.4 | 0.1   | 8.9  | 2.6   | 100% |
| +;pdfGAL4/P[ry[+7.2]=PZ]NAT1[O1424];UAS-NAT1R/+                  | 43 | 25.6 | 0.4 | 0.2 | 3.9 | 0.5    | 0.3 | 0.1   | 7.1  | 1.3   | 56%  |
| +;pdfGAL4/P[w[+mGT]=GT1]NAT1[BG02338];UAS-NAT1R/+                | 30 | 25.5 | 0.4 | 0.1 | 2.5 | 1.3    | 0.4 | 0.2   | 10.2 | 4.0   | 73%  |

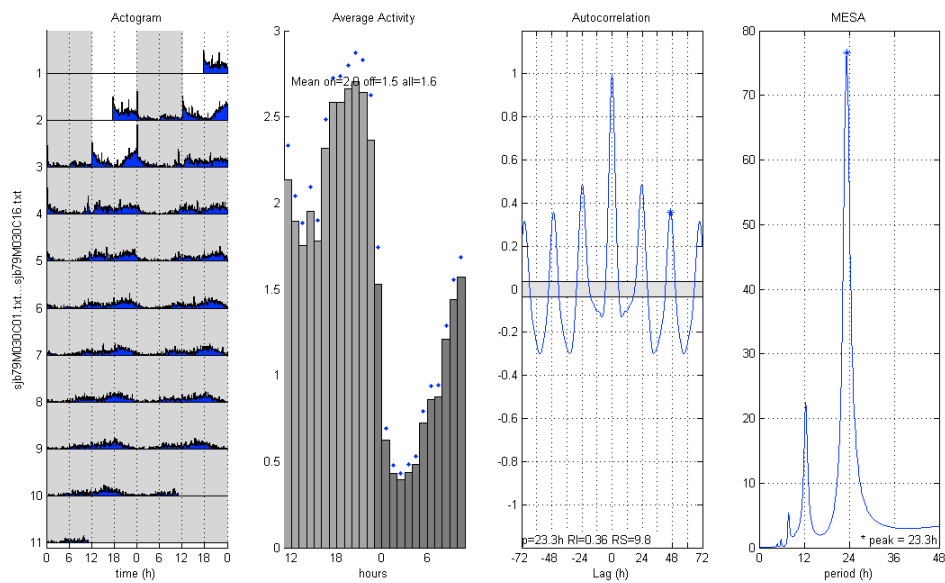

| genotype                                    | n  | mean | sd  | se  | off | off sd | ri  | ri sd | rs   | rs sd | %Rhy |
|---------------------------------------------|----|------|-----|-----|-----|--------|-----|-------|------|-------|------|
| +; pdfGAL4/UAS-FMRPRNAi; UAS-NAT1aRNAi/+    | 26 | 25.0 | 0.4 | 0.1 | 4.1 | 1.8    | 0.5 | 0.1   | 10.2 | 2.0   | 73%  |
| +; pdfGAL4/+; UAS-NAT1aRNAi/UAS-NAT1bRNAi   | 24 | 25.6 | 0.8 | 0.3 | 3.3 | 1.8    | 0.4 | 0.2   | 8.4  | 3.1   | 58%  |
| +; pdfGAL4/UAS-eIF4ARNAi; UAS-NAT1aRNAi/+   | 27 | 25.1 | 0.9 | 0.5 | 4.4 | 1.2    | 0.5 | 0.2   | 10.5 | 3.4   | 26%  |
| +; pdfGAL4/UAS-eIF4GRNAi; UAS-NAT1aRNAi/+   | 23 | 25.4 | 0.8 | 0.3 | 2.7 | 1.9    | 0.3 | 0.1   | 6.5  | 1.5   | 61%  |
| +; pdfGAL4/+; UAS-NAT1aRNAi/UAS-BELRNAi     | 20 | 25.4 | 0.4 | 0.1 | 2.2 | 1.6    | 0.4 | 0.1   | 9.0  | 2.2   | 90%  |
| +; pdfGAL4/UAS-THORRNAi; UAS-NAT1aRNAi/+    | 21 | 24.7 | 0.4 | 0.2 | 4.4 | 3.3    | 0.4 | 0.1   | 7.6  | 2.6   | 62%  |
| +; pdfGAL4/UAS-eIF5CRNAi; UAS-NAT1aRNAi/+   | 20 | 24.9 | 0.8 | 0.3 | 1.4 | 1.3    | 0.4 | 0.1   | 9.1  | 2.3   | 65%  |
| +; pdfGAL4/UAS-PAIP2RNAi; UAS-NAT1aRNAi/+   | 26 | 25.1 | 0.2 | 0.1 | 1.9 | 0.7    | 0.5 | 0.1   | 11.6 | 2.9   | 81%  |
| +; pdfGAL4/+; UAS-NAT1aRNAi/UAS-eIF3.10RNAi | 21 | 25.3 | 1.0 | 0.3 | 3.7 | 1.8    | 0.4 | 0.1   | 8.9  | 1.9   | 71%  |
| +; pdfGAL4/+; UAS-NAT1aRNAi/UAS-AKTRNAi     | 22 | 24.4 | 0.6 | 0.2 | 1.5 | 0.6    | 0.4 | 0.1   | 8.4  | 1.3   | 64%  |
| +; pdfGAL4/UAS-LK6RNAi; UAS-NAT1aRNAi/+     | 24 | 25.2 | 0.4 | 0.1 | 2.1 | 1.2    | 0.5 | 0.1   | 10.7 | 2.4   | 83%  |

**Figure S4** P-element insertions at the NAT1 locus combined with *pdf>NAT1RNAi* provided no additional increase in period lengthening. (Top) Various combinations of mutant alleles, where the most severe period phenotype is present with two copies of *UAS-NAT1RNAi*. Behavior metrics are calculated for flies with a DD rhythmic index of 0.2 or more. (Middle) only one mutant allele, dNAT P2, provided a period effect on its own, which was faster than WT controls. (Bottom) Combinations of interesting RNAi lines in PDF cells do not provide significant alterations from the *pdf>NAT1RNAi* long-period phenotype, although an increased fraction of arrhythmic flies was found. Behavior metrics are calculated for flies with a DD rhythmic index of 0.2 or more.
