# Supplementary material for: NAT1/DAP5/p97 and Atypical Translational Control in the Drosophila Circadian Oscillator
Source: Oxford University Press journal article supplement (doi:10.1534/genetics.112.143248), 2012-08-19
Supplement: genetics.112.143248-3.pdf [file genetics.112.143248-3.pdf]

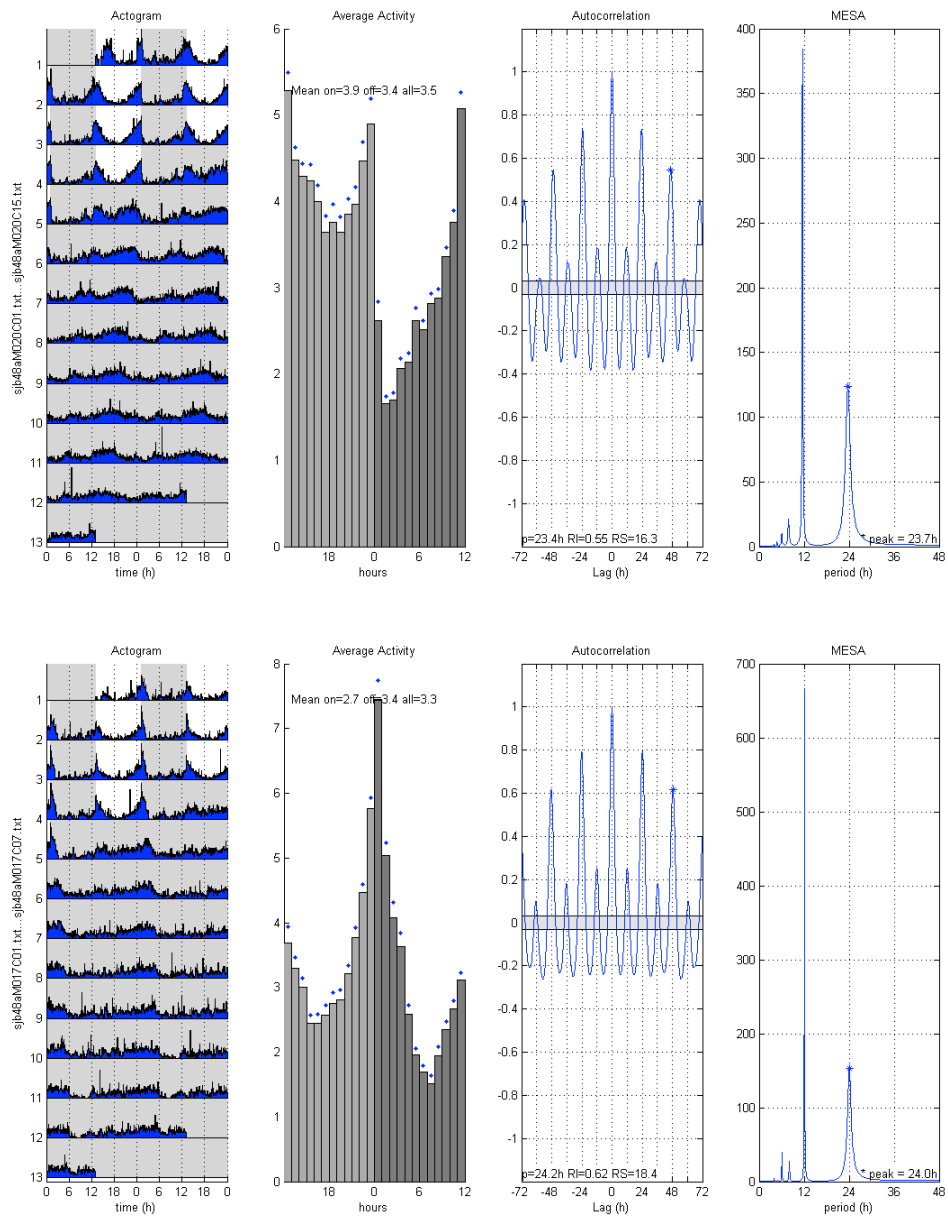

**Figure S3** Flies homozygous for *uasNAT1* transgenes. (Top) Flies carrying two copies of a full-length *uasNAT1* construct have fast rhythms and persistent morning peaks. (Bottom) Elements in the 5'UTR of *NAT1* are required for the effect, as a 5' truncation of the transgene produces normal rhythms and a rapidly dampened morning peak.
