# Supplementary material for: NAT1/DAP5/p97 and Atypical Translational Control in the Drosophila Circadian Oscillator
Source: Oxford University Press journal article supplement (doi:10.1534/genetics.112.143248), 2012-08-19
Supplement: genetics.112.143248-4.pdf [file genetics.112.143248-4.pdf]

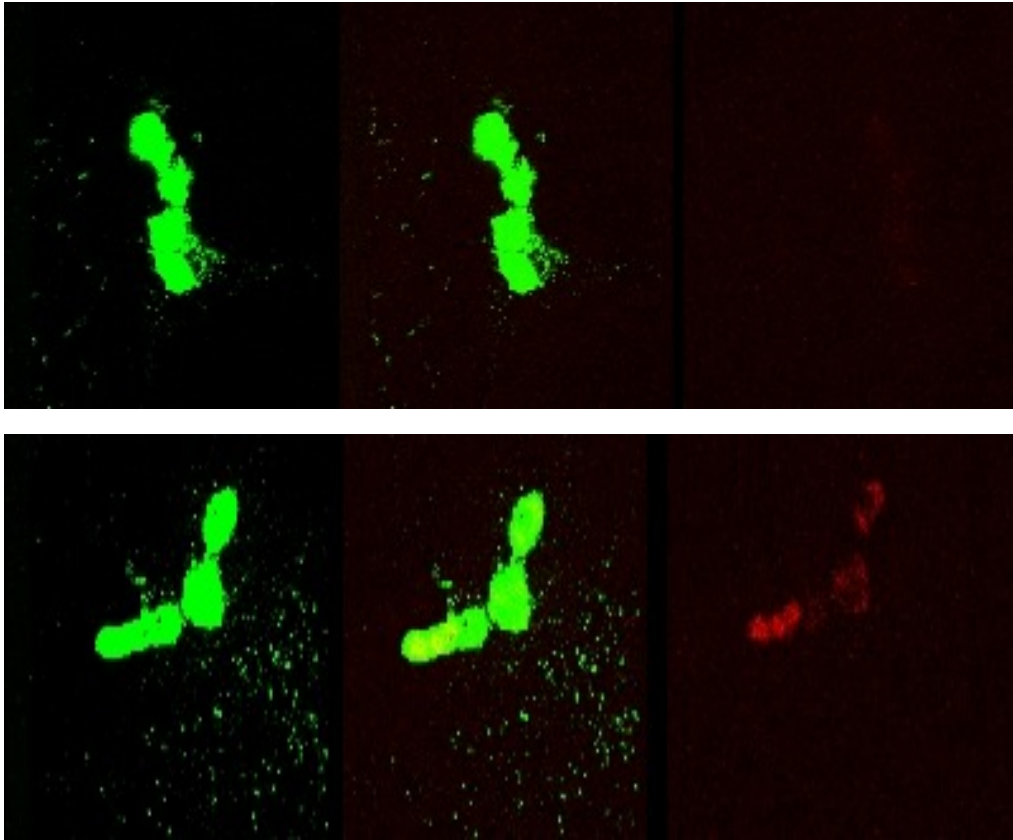

**Figure S2** Staining for PDF (green) and PER (red) in PDF+ LNV cells at CT3 of DD2 reveals much lower expression in *tim>NAT1RNAi* fly brains (Top) compared to *tim-GAL4* controls (Bottom). This indicates that the decrement in PER expression presented in Figure 4 is not due to a phase delay resulting from the slower period length in these flies, but instead to lower expression of PER in *NAT1* knockdown.
