# Supplementary material for: NAT1/DAP5/p97 and Atypical Translational Control in the Drosophila Circadian Oscillator
Source: Oxford University Press journal article supplement (doi:10.1534/genetics.112.143248), 2012-08-19
Supplement: genetics.112.143248-5.xls [file genetics.112.143248-5.xls]

## Sheet: Behavior Results
								Results with PDF Driver													Results with tim Driver
			Rank	Gene	Function	Gene	CG#	N	Period (hrs)	SD	SE	off	off sd	ri	ri sd	rs	rs sd	%Rhy		Rank	N	Period (hrs)	SD	SE	off	off sd	ri	ri sd	rs	rs sd	%Rhy
Gene Tested	Function		0		controls	DRIVERS	Tim/PDF	14	24.51	0.17	0.05	2.6	0.77	0.41	0.08	9.31	1.86	1		0	13	24.22	0.33	0.09	1.48	0.73	0.44	0.08	10.08	1.8	1
Spargel	rna binding, pcg1a		1	pabp2	translation	PABP2	CG2163	10	25.62	1.46	0.73	3.95	1.67	0.42	0.09	8.82	1.96	0.555556		1	12	23.7	0.29	0.13	1.56	0.52	0.44	0.27	12.58	7.69	0.75
ist1	U2 snRNP		2	Nat1/Dap5/p97	specific translation	Nat1b	CG3845	15	25.5	0.9	0.765	2.22	1.215	0.3	0.095	6.795	2.1	0.714286		2	28	26.365	1.445	0.835	1.85	0.89	0.31	0.085	7.015	1.93	0.727273
PTBP	splicing		3	Nat1	specific translation	Nat1a	CG3845	13	25.43	0.43	0.13	1.91	0.49	0.44	0.09	10.62	2.09	0.923077		3	16	25.93	0.29	0.11	12.46	5.6	0.43	0.14	4.3	1.4	0.8125
eif4AIII	splicing		4	Paip2	specific translation	PAIP2	CG12358	12	25.34	0.34	0.1	3.41	1.17	0.47	0.08	10.68	1.82	1		4	16	24.91	0.48	0.12	1.35	0.82	0.36	0.09	8.22	2.14	1
La	splicing		5	eif-4a	initiation	eif-4a	CG9075	13	25	3.68	2.6	9.8	2.26	0.32	0.08	4.4	1.13	0.52		5		lethal in tim
larp	splicing		6	PCG1a/Spargel	rna binding	PCG1a	CG9809	13	24.99	0.54	0.17	9.99	3.4	0.41	0.18	5.8	2.58	0.769231		6	13	25.39	0.28	0.08	2.23	1.03	0.44	0.13	9.94	2.88	0.923077
CstF50	PA cleavage		7	eif4G	initiation	eIF4G	CG10811	16	24.95	0.34	0.14	3.15	1.09	0.45	0.2	12.95	5.82	0.75		7	10	23.7	0.28	0.11	2.3	0.64	0.51	0.11	14.57	3.01	1
bel	helicase		8	fmrp	specific translation	FMR1	CG6203	12	24.87	0.67	0.28	2.08	0.67	0.35	0.16	7.43	3.52	1		8	14	25.24	0.28	0.08	2.33	1.09	0.42	0.06	9.54	1.41	0.857143
Lark	helicase		9	bel	helicase	Bel	CG9748	11	24.81	0.21	0.07	2.51	0.91	0.39	0.1	8.8	2.29	0.909091		9	13	24.47	0.38	0.11	1.53	0.42	0.48	0.09	10.14	2	0.923077
Ddx1	helicase		10	eIF5C/exba/shot	specific translation	eIF5C	CG2922	13	24.79	0.17	0.05	2.5	1.11	0.48	0.08	11.01	1.89	0.923077		10	13	24.98	0.24	0.07	1.64	0.61	0.44	0.1	10.11	2.2	1
PAP(hrg)	pA polymerase		11	eif3.10	initiation	eIF3s10	CG9805	15	24.79	0.49	0.15	2.64	1.06	0.38	0.11	9.82	2.92	0.733333		11	13	24.58	0.26	0.07	2.12	0.66	0.6	0.1	15.65	2.66	0.923077
eif2a	initiation		12	lk6	Kinase	lk6	CG17342	13	24.78	0.69	0.2	3.43	0.97	0.59	0.14	15.29	3.58	0.923077		12	12	24.82	0.2	0.06	1.89	0.61	0.56	0.13	14.64	3.3	0.916667
eif3.10	initiation		13	eif4AIII	splicing	eif4AIII	CG7483	13	24.66	0.51	0.15	1.46	0.57	0.44	0.12	9.54	2.55	0.923077		13	16	23.54	0.44	0.17	1.79	1.2	0.4	0.17	11.51	4.83	0.875
eif3.2(s4?)	initiation		14	pdcd4	Kinase	pdcd4	CG10990	13	24.65	0.19	0.05	2.68	0.96	0.48	0.06	10.87	1.35	1		14	16	24.62	0.2	0.05	2.57	0.89	0.47	0.06	10.68	1.28	1
eif-4a	initiation		15	eif4E	initiation	eif4e	CG4035	12	24.64	0.24	0.07	3.71	1.3	0.38	0.08	8.57	1.88	0.916667		15		lethal in tim
eif4G	initiation		16	eif2a	initiation	eif2a	CG7414	11	24.58	0.41	0.14	1.74	0.86	0.55	0.14	14.27	3.59	0.818182		16	10	24.57	0.39	0.12	1.79	0.82	0.56	0.13	14.44	3.43	1
eif4E	initiation		17	Ddx1	helicase	Ddx1	CG9054	8	24.52	0.16	0.07	21.43	4.84	0.53	0.07	5.32	0.67	1		17	8	25.04	0.21	0.08	12.29	1.89	0.44	0.16	4.43	1.6	0.875
pixie	initiation		18	eEF1a	elongation	eEF1a	CG1873	11	24.52	0.31	0.11	3	1.08	0.61	0.1	15.93	2.52	0.727273		18	12	24.59	0.26	0.08	1.98	0.65	0.42	0.06	9.49	1.3	1
PABP	translation		19	PABP	translation	PABP	CG5119	13	24.5	0.23	0.06	1.51	0.85	0.49	0.1	11.72	2.32	1		19	13	24.74	0.4	0.11	1.1	1.09	0.5	0.12	12.15	2.82	1
pabp2	translation		20	gw182	specific translation	GW182	CG31992	13	24.48	0.32	0.09	4.79	1.09	0.42	0.11	9.57	2.37	0.923077		20	12	24.89	0.24	0.07	3.41	0.75	0.45	0.06	10.32	1.48	1
eEF1a	elongation		21	PAP/hrg	pA polymerase	PAP	CG9854	16	24.42	0.44	0.12	1.94	0.65	0.36	0.09	7.88	1.97	0.8125		21	10	24.68	0.63	0.2	2.44	1.22	0.4	0.14	9.17	3.13	1
eEF2	elongation		22	pixie	initiation	pix	CG5651	14	24.41	0.27	0.08	3.12	1.17	0.46	0.09	10.5	2	0.785714		22	13	24.72	0.28	0.08	2.03	1.11	0.37	0.1	8.43	2.4	0.846154
aret	specific translation		23	CstF50	PA cleavage	cstf-50	CG2261	15	24.39	0.26	0.07	1.59	0.81	0.58	0.1	13.97	2.42	1		23	14	24.59	0.3	0.08	2.38	1.14	0.46	0.06	10.52	1.28	1
cup	specific translation		24	4EBP/thor)	specific translation	4EBP	CG8846	13	24.36	0.77	0.22	2.38	0.58	0.33	0.09	7.27	2.04	0.923077		24	12	24.53	0.48	0.2	1.6	0.35	0.48	0.16	13.85	4.52	1
eIF5C	specific translation		25	eif3.2(s4?)	initiation	eIF3s2	CG10881	15	24.36	0.34	0.09	2.83	1.46	0.57	0.1	14.77	2.72	1		25	14	24.72	0.36	0.1	1.77	0.69	0.55	0.14	14.32	3.59	0.857143
4EBP(thor)	specific translation		26	akt	Kinase	akt	CG4006	13	24.32	0.29	0.08	3.41	1.15	0.64	0.14	16.52	3.7	0.923077		26	12	24.61	0.91	0.3	1.56	0.55	0.46	0.16	11.83	4.11	0.75
Nat1	specific translation		27	larp	splicing	Larp	CG14066	15	24.31	0.11	0.03	3.27	0.76	0.45	0.09	10.24	2.11	1		27	13	24.65	0.28	0.08	1.07	0.54	0.53	0.13	13.78	3.35	1
Paip2	specific translation		28	ist1	U2 snRNP	ist3	CG10466	12	24.23	0.27	0.08	3.39	1.37	0.52	0.09	11.81	1.91	0.916667		28	7	24.87	0.19	0.07	12.34	3.32	0.55	0.07	5.46	0.7	1
gw182	specific translation		29	vig	specific translation	vig	CG4170	15	24.22	0.33	0.09	3.21	0.87	0.47	0.09	10.72	2.15	0.933333		29	14	24.53	0.28	0.07	1.81	0.66	0.49	0.12	11.19	2.78	1
fmrp	specific translation		30	PTBP/heph	splicing	PTBP	cg31000	14	24.2	0.29	0.08	2.83	0.76	0.56	0.11	14.26	2.75	1		30	13	24.71	0.22	0.06	1.85	0.45	0.55	0.12	13.97	3.18	0.923077
vig	specific translation		31	Lark	helicase	Lark	CG8597	12	24.13	0.39	0.11	1.98	0.93	0.64	0.09	16.57	2.26	1		31	15	24.27	0.19	0.05	2.96	1.03	0.47	0.11	10.65	2.41	1
akt	Kinase		32	La	splicing	La	CG11505	14	24.12	0.29	0.08	2.44	0.83	0.49	0.09	11.22	2.09	0.928571		32	9	24.31	0.53	0.18	0.93	0.35	0.44	0.14	11.34	3.67	1
lk6	Kinase		33	aret/bruno	specific translation	aret	CG31762	9	23.9	0.85	0.6	12.65	0.92	0.44	0.33	4.7	3.54	0.692308		33	8	24.46	0.26	0.1	12.76	5.7	0.44	0.12	4.44	1.16	0.875
pdcd4	Kinase		34	cup	specific translation	cup	CG11181	11	23.8	0.71	0.5	10.45	0.35	0.36	0.13	3.75	1.34	0.647059		34	14	24.36	0.14	0.04	3.59	1.66	0.4	0.06	9.1	1.38	0.857143
pask	Kinase		35	eEF2	elongation	eEF2	CG2238	12	22.85	0.78	0.55	1.25	0.64	0.26	0.08	6.85	2.19	0.333333		35		lethal in tim
				Key
				Rank	RNAi lines are listed in oder of the length of the behavioral period following knockdown in PDF cells.
				Function	RNAi targets were categorized roughly with regard to their primary annotated function.
				Gene	Gene names most commonly used for each RNAi target.
				CG	GC numbers are provided to avoid ambiguity
				N	The number of flies tested providing the data tabulated.
				Period (hrs)	Period length of flies with a rhythmic index over 0.2 for 6 days in DD.
				SD	Standard deviation of the period length for rhythmic flies.
				SE	Standard error of the meanf or the period length for rhythmic flies.
				off	Activity levels in contant darkness of the flies tested.
				off sd	Standard deviation of the activity levels in constant darkness.
				ri	Rhythmic index provided by autocorrelation anlysis for rhythmic flies.
				ri sd	Standard deviation of the rhythmic indexes for a test group.
				rs	Rhythmic strength provided by autocorrelation analysis for rhythmic flies.
				rs sd	Standard deviation of the rhythmic strength for a test group.
				%Rhy	Percent of flies in a test group providing rhythmic indeces over 0.2.

## Sheet: Line Information
#	Name	CG	Transformant ID	Construct ID	Synonyms	RNAi library	ON Targets	OFF Targets	s19	CAN Repeats	Viability	Chr
1	dNAT1a	CG3845	34719	11088	l(2)01424	GD	1	4	0.99	3	viable	3
2	dNAT1b	CG3845	105121	101425	l(2)01424	KK	1	1	1	2	viable	2
3	cg9809,Spargel	CG9809	103355	100201	Spargel	KK	1	0	1	3	viable	2
4	ist1A	CG10466	23367	13426	ist1	GD	1	0	1	3	viable	1
5	ist1B	CG10466	23368	13426	ist1	GD	1	0	1	3	viable	3
6	ist1C	CG10466	104715	108199	ist1	KK	1	1	0.92	2	viable	2
7	aretA	CG31762	41567	8699	aret	GD	1	2	0.99	2	viable	3
8	aretB	CG31762	4xxx7	8699	aret	GD	1	2	0.99	2	viable	3
9	aretC	CG31762	107459	110026	aret	KK	1	0	1	2	viable	2
10	cup	CG11181	18179	7226	cup	GD	1	0	1	2	viable	3
11	PABP	CG5119	22007	11542	PABP	GD	1	0	1	3	viable	3
12	Ddx1a	CG9054	29017	14106	ist1	GD	1	0	1	2	viable	3
13	Ddx1b	CG9054	29019	14106	Ddx1...	GD	1	0	1	2	viable	3
14	Ddx1c	CG9054	103365	100273	Ddx1...	KK	1	0	1	2	viable	2
15	FMR1	CG6203	8933	1288	fmrp	GD	1	0	1	2	viable	2
16	hrg	CG9854	42286	14701	hrg	GD	1	0	1	2	lethal	3
17	hrg	CG9854	42283	14701	hrg	GD	1	0	1	2	viable	2
18	hrg	CG9854	105978	101724	hrg	KK	1	0	1	2	viable	2
19	cstf-50	CG2261	109583	107473	CstF50	KK	1	0	1	3	viable	2
20	eif-4a	CG9075	42202	14111	eif-4a	GD	1	1	0.99	2	viable	3
21	vig	CG4170	26408	11239	vig	GD	1	0	1	3	viable	2
22	pabp2	CG2163	106466	102711	pabp2	KK	1	0	1	2	viable	2
23	pabp2	CG2163	33499	9743	pabp2	GD	1	0	1	2	viable	3
24	eif4g	CG10811	17002	7098	eif4g	GD	1	0	1	3	viable	2
25	eif4g	CG10811	17003	7098	eif4g	GD	1	0	1	3	viable	2
26	eif4AIII	CG7483	108580	101462	eif4AIII	KK	1	1	1	3	viable	2
27	bel	CG9748	6299	1324	l(3)85Ac	GD	1	3	0.93	2	lethal	3
28	eif4e	CG4035	100722	108104	eif4E	KK	1	1	0.99	2	viable	2
29	eif4e	CG4035	7800	1432	eif4E	GD	1	1	0.99	2	viable	3
30	vig	CG4170	109655	102174	vig	KK	1	0	1	3	viable	2
31	vig	CG4170	26409	11239	vig	GD	1	0	1	3	viable	3
32	eif-4a	CG9075	42201	14111	eif4A	GD	1	1	0.99	2	lethal	2
33	eif-4a	CG9075	100310	107917	eif4A	KK	1	1	0.99	2	viable	2
34	thor	CG8846	35439	12533	CT8705,d4EBP	GD	1	0	1	2	viable	3
35	Larp	CG14066	107986	107732	Larp	KK	1	0	1	2	viable	2
36	Larp	CG14066	24841	8215	Larp	GD	1	9	0.97	3	viable	3
37	pdcd4	CG10990	16160	7160	pdcd4	GD	1	0	1	3	viable	3
38	pdcd4	CG10990	16162	7160	pdcd4	GD	1	0	1	3	sterile	3
39	eIF5C	CG2922	102609	102900	eIF5C	KK	1	0	1	3	viable	2
40	eIF5C	CG2922	25165	8839	eIF5C	GD	1	0	1	2	sterile	3
41	Paip2	CG12358	49326	6683	Paip2	GD	1	0	1	3	viable	3
42	Paip2	CG12358	106413	111840	Paip2	KK	1	0	1	2	lethal	2
43	la	CG11505	15286	5995	la	GD	1	615	0.09	19	viable	3
44	la	CG11505	105949	100069	la	KK	1	1	1	3	viable	2
45	eEF1a	CG1873	52343	17776	eEF1a	GD	1	1	0.98	2	viable	2
46	Lark	CG8597	108993	107711	Lark	KK	1	1	1	2	viable	2
47	eEF2	CG2238	107268	102124	eEF2	KK	1	0	1	3	viable	2
48	gw	CG31992	45772	10428	gw	GD	1	0	1	3	viable	2
49	gw	CG31992	45773	10428	gw	GD	1	0	1	3	viable	1
50	gw	CG31992	103581	101472	gw	KK	1	0	1	3	viable	2
51	sima	CG7951	106187	102226	sima	KK	1	1	1	3	viable	2
52	dap5	CG3845	105121	101425	dap5	KK	1	1	1	2	viable	2
53	pix	CG5651	44325	11721	pix	GD	1	0	1	3	sterile	3
54	pix	CG5651	109630	101664	pix	KK	1	2	1	2	viable	2
55	gce	CG6211	11176	4350	gce	GD	1	1	1	2	viable	1
56	gce	CG6211	101814	109764	gce	KK	1	1	1	2	viable	2
57	pask	CG3105	107025	100299	pask	KK	1	0	1	2	lethal	2
58	pask	CG3105	25661	10147	pask	GD	1	0	1	3	viable	3
59	CG2094,CG2290,dmPTB	cg31000	33735	CG31000	CG2094,CG2290,dmPTB	GD	1	0	1	3	viable	3
60	CG2094,CG2290,dmPTB	cg31000	110748	CG31000	CG2094,CG2290,dmPTB	KK	1	0	1	3	viable	2
61	eif3.10	CG9805	28140	12569	eif3.10	GD	1	0	1	2	lethal	3
62	eif3.2(s4?)	CG10881	35495	12611	eif3.2(s4?)	GD	1	3	0.94	2	viable	2
63	eif3.2(s4?)	CG10881	106972	100352	eif3.2(s4?)	KK	1	2	0.99	2	viable	2
64	akt	CG4006	2902	1361	akt	GD	1	0	1	2	viable	3
65	akt	CG4006	103703	100495	akt	KK	1	0	1	2	viable	2
66	eif2a	CG7414	107955	102008	eif2a	KK	1	0	1	2	viable	2
67	eif2a	CG7414	18804	5560	eif2a	GD	1	0	1	2	lethal	2
68	lk6	CG17342	32885	9353	lk6	GD	1	3	0.99	4	viable	3
69	lk6	CG17342	30389	3921	lk6	GD	1	18	0.92	5	viable	3
70	lk6	CG17342	109663	102607	lk6	KK	1	0	1	2	viable	2
