# Supplementary material for: NAT1/DAP5/p97 and Atypical Translational Control in the Drosophila Circadian Oscillator
Source: Oxford University Press journal article supplement (doi:10.1534/genetics.112.143248), 2012-08-19
Supplement: genetics.112.143248-6.pdf [file genetics.112.143248-6.pdf]

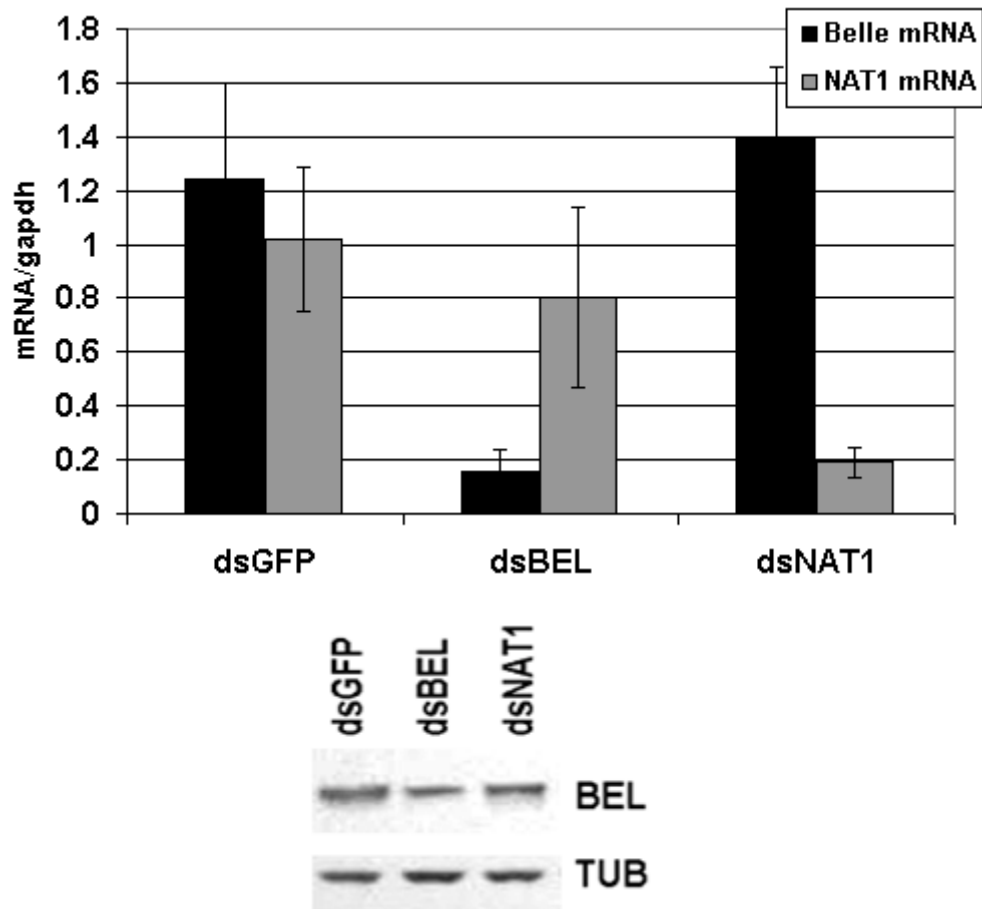

**Figure S5** *Drosophila* S2 cells were treated with double-stranded (ds)RNA against Belle, NAT1 or GFP as a control. (Top) RNAi of NAT1 or BEL causes a dramatic decrease in the mRNA for these genes. (Bottom) Western blotting confirms the knockdown of BEL, and shows that NAT1 RNAi causes some reduction of BEL levels, although less pronounced than the effect found in fly heads.
