# Supplementary material for: NAT1/DAP5/p97 and Atypical Translational Control in the Drosophila Circadian Oscillator
Source: Oxford University Press journal article supplement (doi:10.1534/genetics.112.143248), 2012-08-19
Supplement: genetics.112.143248-7.pdf [file genetics.112.143248-7.pdf]

| <i>pdfGAL4 with UAS-DICER2</i> |    |              |     |      |     |        |     |       |      |       | <i>timGAL4 with UAS-DICER2</i> |               |              |     |      |     |        |     |       |      |       |      |
|--------------------------------|----|--------------|-----|------|-----|--------|-----|-------|------|-------|--------------------------------|---------------|--------------|-----|------|-----|--------|-----|-------|------|-------|------|
|                                | N  | Period (hrs) | SD  | SE   | OFF | OFF SD | RI  | RI SD | RS   | RS SD | %Rhy                           | N             | Period (hrs) | SD  | SE   | OFF | OFF SD | RI  | RI SD | RS   | RS SD | %Rhy |
| Drivers                        | 20 | 24.7         | 0.3 | 0.11 | 2.0 | 2.0    | 0.5 | 0.1   | 10.6 | 1.5   | 70%                            | 24            | 24.0         | 0.3 | 0.1  | 2.8 | 0.8    | 0.5 | 0.1   | 11.4 | 2.5   | 92%  |
| pabp2                          | 26 | 25.5         | 0.4 | 0.11 | 2.3 | 0.8    | 0.4 | 0.1   | 9.3  | 2.3   | 92%                            | 24            | 24.4         | 1.5 | 0.61 | 1.7 | 3.0    | 0.4 | 0.1   | 7.9  | 2.6   | 50%  |
| NAT1B                          | 28 | 27.1         | 0.8 | 0.29 | 3.2 | 0.8    | 0.3 | 0.1   | 7.3  | 2.2   | 57%                            | 53            | 27.7         | 0.4 | 0.23 | 1.8 | 0.8    | 0.4 | 0.1   | 8.8  | 2.0   | 45%  |
| NAT1A                          | 32 | 24.8         | 0.6 | 0.24 | 2.9 | 0.6    | 0.3 | 0.1   | 7.3  | 2.6   | 63%                            | 31            | 23.4         | 1.1 | 0.46 | 1.1 | 1.3    | 0.3 | 0.2   | 7.2  | 3.6   | 26%  |
| paip2a                         | 20 | 25.7         | 1.0 | 0.34 | 3.4 | 1.8    | 0.4 | 0.1   | 8.4  | 2.7   | 90%                            | 20            | 24.5         | 0.4 | 0.14 | 2.7 | 1.6    | 0.5 | 0.1   | 10.6 | 2.6   | 90%  |
| eif4a                          | 21 | 24.7         | 1.1 | 0.48 | 2.5 | 0.5    | 0.3 | 0.1   | 5.7  | 1.2   | 52%                            | lethal in tim |              |     |      |     |        |     |       |      |       |      |
| eif4g                          | 20 | 24.7         | 1.4 | 0.54 | 2.9 | 0.9    | 0.3 | 0.1   | 7.3  | 2.1   | 70%                            | 30            | 24.8         | 1.2 | 0.43 | 3.4 | 1.5    | 0.3 | 0.1   | 6.9  | 2.2   | 67%  |
| FMRI                           | 26 | 24.3         | 0.2 | 0.04 | 3.7 | 1.7    | 0.5 | 0.1   | 10.5 | 2.1   | 92%                            | 24            | 24.2         | 0.3 | 0.08 | 3.3 | 1.4    | 0.5 | 0.1   | 10.7 | 2.4   | 92%  |
| eif5c                          | 26 | 26.0         | 0.8 | 0.30 | 3.3 | 1.8    | 0.5 | 0.1   | 11.8 | 2.9   | 67%                            | 24            | 24.5         | 0.4 | 0.12 | 3.1 | 1.2    | 0.5 | 0.1   | 11.3 | 2.3   | 88%  |
| eif3.10                        | 23 | 25.2         | 0.9 | 0.35 | 4.2 | 1.5    | 0.4 | 0.1   | 9.1  | 2.7   | 64%                            | 20            | 24.0         | 0.2 | 0.05 | 4.5 | 0.7    | 0.5 | 0.1   | 11.3 | 2.2   | 100% |
| lk6                            | 28 | 25.6         | 1.2 | 0.34 | 3.1 | 1.5    | 0.4 | 0.1   | 9.7  | 2.8   | 86%                            | 21            | 24.6         | 0.2 | 0.07 | 2.9 | 1.3    | 0.5 | 0.1   | 11.9 | 2.1   | 90%  |
| bel                            | 24 | 24.5         | 0.4 | 0.10 | 3.1 | 1.8    | 0.5 | 0.1   | 9.9  | 2.8   | 100%                           | 30            | 24.2         | 0.2 | 0.08 | 4.9 | 1.1    | 0.5 | 0.1   | 11.8 | 1.5   | 100% |
| thor                           | 25 | 24.4         | 0.2 | 0.05 | 2.6 | 1.5    | 0.5 | 0.1   | 11.0 | 2.2   | 100%                           | 22            | 23.9         | 0.3 | 0.11 | 3.2 | 1.1    | 0.5 | 0.1   | 10.5 | 2.3   | 92%  |
| eEF2                           | 24 | 23.4         | 0.6 | 0.34 | 4.7 | 1.8    | 0.3 | 0.0   | 5.8  | 0.7   | 17%                            | 20            | 24.5         | 0.3 | 0.09 | 4.5 | 0.8    | 0.5 | 0.1   | 11.3 | 1.6   | 91%  |
| akt                            | 23 | 25.7         | 0.6 | 0.21 | 3.8 | 0.9    | 0.4 | 0.1   | 9.4  | 2.9   | 64%                            | 30            | 24.5         | 0.8 | 0.30 | 2.2 | 1.0    | 0.4 | 0.2   | 9.6  | 3.6   | 63%  |

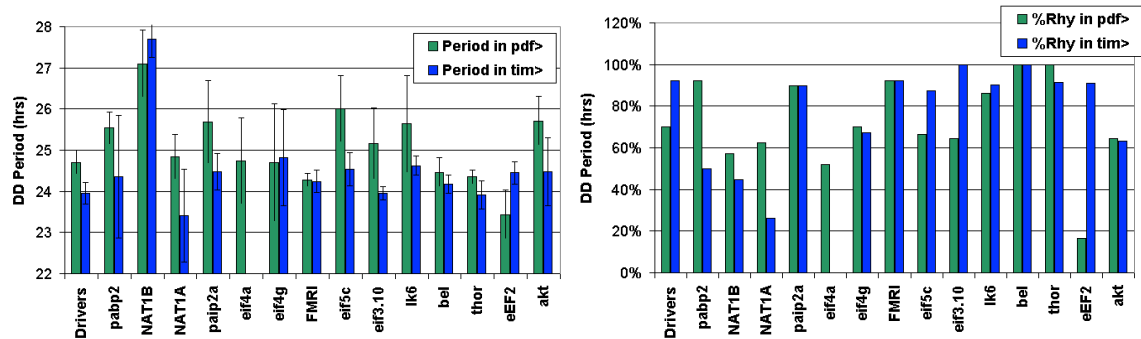

**Figure S1** A subset of interesting RNAi lines were tested in combination with *PDF-GAL4* or *TIM-GAL4* with *UAS-DICER2*. In general the effects of the knockdown were more severe, with substantially fewer highly rhythmic flies. Significant period lengthening effects were revealed for *AKT* and *LK6*, which were not apparent without *UAS-DICER2*. Surprisingly, some effects on period were reduced in severity, perhaps due to non-specific effects of *DICER2* overexpression. This was the case for the second line targeting *NAT1*, which produced a less severe period-lengthening effect in combination with *tim>UAS-DICER2*, and *eEF2*, which was no longer lethal with the addition of *DICER2* overexpression.
